# Supplementary material
Source: ML conference proceedings conference paper supplement (https://proceedings.neurips.cc/paper_files/paper/2012/hash/170c944978496731ba71f34c25826a34-Abstract.html)
Supplement: Supplementary file 1 [file 170c944978496731ba71f34c25826a34-Supplemental.zip]

## S.1 Proofs

### S.1.1 Lemma 3.1

*Proof.* From the matrix inversion lemma we have

$$\mathbf{A}^{-1} = \frac{1}{\alpha} \mathbf{I} - \frac{1}{\alpha^2} \Phi_x^T \left( \frac{1}{\beta} \mathbf{I} + \frac{1}{\alpha} \Phi_x \Phi_x^T \right)^{-1} \Phi_x = \frac{1}{\alpha} \mathbf{I} - \frac{1}{\alpha^2} \Phi_x^T \left( \frac{1}{\beta} \mathbf{I} + \frac{1}{\alpha} \mathbf{K}_x^T \right)^{-1} \Phi_x \quad (16)$$

$$\begin{aligned} &= \frac{1}{\alpha} \mathbf{I} - \frac{1}{\alpha^2} \Phi_x^T \left( \frac{1}{\beta} \mathbf{V} \mathbf{V}^T + \frac{1}{\alpha} \mathbf{V} \Lambda \mathbf{V}^T \right)^{-1} \Phi_x = \frac{1}{\alpha} \mathbf{I} - \frac{1}{\alpha^2} \Phi_x^T \mathbf{V} \left( \frac{1}{\beta} \mathbf{I} + \frac{1}{\alpha} \Lambda \right)^{-1} \mathbf{V}^T \Phi_x \\ &= \frac{1}{\alpha} \mathbf{I} - \Phi_x^T \mathbf{V} \text{diag} \left\{ \alpha \lambda_i + \frac{\alpha^2}{\beta} \right\}^{-1} \mathbf{V}^T \Phi_x \end{aligned} \quad (17)$$

Now suppose that  $\mathbf{A}^{-\frac{1}{2}} = \frac{1}{\sqrt{\alpha}} \mathbf{I} - \Phi_x^T \mathbf{V} \mathbf{D} \mathbf{V}^T \Phi_x$  for unknown diagonal matrix  $\mathbf{D}$ . Squaring, we obtain

$$\frac{1}{\alpha} \mathbf{I} - \frac{2}{\sqrt{\alpha}} \Phi_x^T \mathbf{V} \mathbf{D} \mathbf{V}^T \Phi_x + \Phi_x^T \mathbf{V} \mathbf{D} \mathbf{V}^T \mathbf{K}_x \mathbf{V} \mathbf{D} \mathbf{V}^T \Phi_x \quad (18)$$

$$= \frac{1}{\alpha} \mathbf{I} - \frac{2}{\sqrt{\alpha}} \Phi_x^T \mathbf{V} \mathbf{D} \mathbf{V}^T \Phi_x + \Phi_x^T \mathbf{V} \mathbf{D} \mathbf{V}^T \mathbf{V} \Lambda \mathbf{V}^T \mathbf{V} \mathbf{D} \mathbf{V}^T \Phi_x \quad (19)$$

$$= \frac{1}{\alpha} \mathbf{I} - \frac{2}{\sqrt{\alpha}} \Phi_x^T \mathbf{V} \mathbf{D} \mathbf{V}^T \Phi_x + \Phi_x^T \mathbf{V} \mathbf{D} \Lambda \mathbf{D} \mathbf{V}^T \Phi_x \quad (20)$$

$$= \frac{1}{\alpha} \mathbf{I} - \Phi_x^T \mathbf{V} \left( \frac{2}{\sqrt{\alpha}} \mathbf{D} - \mathbf{D} \Lambda \mathbf{D} \right) \mathbf{V}^T \Phi_x \quad (21)$$

$$= \frac{1}{\alpha} \mathbf{I} - \Phi_x^T \mathbf{V} \text{diag} \left\{ \frac{2d_i}{\sqrt{\alpha}} - \lambda_i d_i^2 \right\} \mathbf{V}^T \Phi_x. \quad (22)$$

To solve the  $d_i$  we equate

$$\frac{1}{\alpha \lambda_i + \frac{\alpha^2}{\beta}} = \frac{2d_i}{\sqrt{\alpha}} - \lambda_i d_i^2, \quad (23)$$

which is quadratic in  $d_i$ . Solving yields

$$d_i = \frac{1}{\lambda_i} \left( \frac{1}{\sqrt{\alpha}} \pm \frac{1}{\sqrt{\alpha + \beta \lambda_i}} \right). \quad (24)$$

Selecting the minus (vs the plus) will produce a pd matrix. We obtain

$$\mathbf{A}^{-\frac{1}{2}} = \frac{1}{\sqrt{\alpha}} \mathbf{I} + \Phi_x^T \mathbf{V} \text{diag} \left\{ \frac{1}{\lambda_i} \left( \frac{1}{\sqrt{\alpha + \beta \lambda_i}} - \frac{1}{\sqrt{\alpha}} \right) \right\} \mathbf{V}^T \Phi_x = \frac{1}{\sqrt{\alpha}} \mathbf{I} + \Phi_x^T \mathbf{C} \Phi_x. \quad (25)$$

It follows

$$\Phi_x \mathbf{A}^{-\frac{1}{2}} = \frac{1}{\sqrt{\alpha}} \Phi_x + \mathbf{K}_x \mathbf{V} \text{diag} \left\{ \frac{1}{\lambda_i} \left( \frac{1}{\sqrt{\alpha + \beta \lambda_i}} - \frac{1}{\sqrt{\alpha}} \right) \right\} \mathbf{V}^T \Phi_x \quad (26)$$

$$= \frac{1}{\sqrt{\alpha}} \Phi_x + \mathbf{V} \Lambda \mathbf{V}^T \mathbf{V} \text{diag} \left\{ \frac{1}{\lambda_i} \left( \frac{1}{\sqrt{\alpha + \beta \lambda_i}} - \frac{1}{\sqrt{\alpha}} \right) \right\} \mathbf{V}^T \Phi_x \quad (27)$$

$$= \frac{1}{\sqrt{\alpha}} \mathbf{V} \mathbf{V}^T \Phi_x + \mathbf{V} \text{diag} \left\{ \frac{1}{\sqrt{\alpha + \beta \lambda_i}} - \frac{1}{\sqrt{\alpha}} \right\} \mathbf{V}^T \Phi_x \quad (28)$$

$$= \mathbf{V} \left( \frac{1}{\sqrt{\alpha}} \mathbf{I} + \text{diag} \left\{ \frac{1}{\sqrt{\alpha + \beta \lambda_i}} - \frac{1}{\sqrt{\alpha}} \right\} \right) \mathbf{V}^T \Phi_x \quad (29)$$

$$= \mathbf{V} \text{diag} \left\{ \frac{1}{\sqrt{\alpha + \beta \lambda_i}} \right\} \mathbf{V}^T \Phi_x = \mathbf{B} \Phi_x \quad (30)$$

□

### S.1.2 Lemma 3.2

*Proof.* Observe:

$$\tilde{\mathbf{Q}}^T \tilde{\mathbf{Q}} = (\mathbf{I} - \tilde{\mathbf{U}}\tilde{\mathbf{U}}^T + \tilde{\mathbf{U}}\tilde{\mathbf{G}}\tilde{\mathbf{U}}^T)^T (\mathbf{I} - \tilde{\mathbf{U}}\tilde{\mathbf{U}}^T + \tilde{\mathbf{U}}\tilde{\mathbf{G}}\tilde{\mathbf{U}}^T) \quad (31)$$

$$= \mathbf{I} - \tilde{\mathbf{U}}\tilde{\mathbf{U}}^T + \tilde{\mathbf{U}}\tilde{\mathbf{G}}\tilde{\mathbf{U}}^T - \tilde{\mathbf{U}}\tilde{\mathbf{U}}^T + \tilde{\mathbf{U}}\tilde{\mathbf{U}}^T - \tilde{\mathbf{U}}\tilde{\mathbf{G}}\tilde{\mathbf{U}}^T + \tilde{\mathbf{U}}\tilde{\mathbf{G}}^T\tilde{\mathbf{U}}^T - \tilde{\mathbf{U}}\tilde{\mathbf{G}}^T\tilde{\mathbf{U}}^T + \tilde{\mathbf{U}}\tilde{\mathbf{U}}^T \quad (32)$$

$$= \mathbf{I} \quad (33)$$

□

### S.1.3 Theorem 3.3

We begin with preliminary definitions. For  $\mathbf{V} \in \text{St}(N, r)$ , we define

$$\mathring{\mathcal{R}}(\mathbf{V}) \triangleq \{\mathbf{Y} : \mathbf{Y} \in \text{St}(N, r) \text{ and } \exists \mathbf{A} \in \mathcal{O}(r) \text{ such that } \mathbf{Y} = \mathbf{V}\mathbf{A}\}$$

$$\mathring{\mathcal{N}}(\mathbf{V}) \triangleq \{\mathbf{Y} : \mathbf{Y} \in \text{St}(N, N-r) \text{ and } \mathbf{V}^T \mathbf{Y} = \mathbf{0}_{r \times (N-r)}\}.$$

It follows immediately that  $\mathbf{Y} \in \mathring{\mathcal{R}}(\mathbf{V}) \Leftrightarrow \mathbf{V} \in \mathring{\mathcal{R}}(\mathbf{Y})$  and  $\mathbf{Y} \in \mathring{\mathcal{N}}(\mathbf{V}) \Leftrightarrow \mathbf{V} \in \mathring{\mathcal{N}}(\mathbf{Y})$ .

Given  $\mathbf{Q} \in \mathcal{O}(N)$ , we would like to know if  $\mathbf{Q}$  can be expressed as  $\mathbf{I}_N - \mathbf{V}(\mathbf{I}_r - \mathbf{G})\mathbf{V}^T$  for some orthogonal  $\mathbf{G}$ . If so, we can write  $\mathbf{Q} = \mathbf{I}_N - \mathbf{V}(\mathbf{I}_r - \mathbf{G})\mathbf{V}^T = \mathbf{I}_N - (\mathbf{V}\mathbf{A})(\mathbf{I}_r - \mathbf{A}^T \mathbf{G}\mathbf{A})(\mathbf{V}\mathbf{A})^T$ ,  $\mathbf{A}$  orthogonal, implying that  $\mathbf{Q}$  can be decomposed via any member of  $\mathring{\mathcal{R}}(\mathbf{V})$ . When this decomposition is possible, we say  $\mathbf{Q}$  is supported by  $\mathring{\mathcal{R}}(\mathbf{V})$ .

**Lemma S.1.1.** *Given  $\mathbf{Q} \in \mathcal{O}(N)$  and  $\mathbf{V} \in \text{St}(N, r)$ .  $\mathbf{Q}$  is supported by  $\mathring{\mathcal{R}}(\mathbf{V})$  if and only if for any  $\mathbf{V}_\perp \in \mathring{\mathcal{N}}(\mathbf{V})$  we have  $\mathbf{V}_\perp^T \mathbf{Q} \mathbf{V}_\perp = \mathbf{I}_{N-r}$ .*

*Proof.* ( $\Rightarrow$ ) With  $\mathbf{Q}$  supported by  $\mathring{\mathcal{R}}(\mathbf{V})$ , there exists  $\mathbf{G} \in \mathcal{O}(r)$  such that  $\mathbf{Q} = \mathbf{I}_N - \mathbf{V}(\mathbf{I}_r - \mathbf{G})\mathbf{V}^T$ . It follows that  $\mathbf{V}_\perp^T \mathbf{Q} \mathbf{V}_\perp = \mathbf{V}_\perp^T \mathbf{V}_\perp - \mathbf{V}_\perp^T \mathbf{V}(\mathbf{I}_r - \mathbf{G})\mathbf{V}^T \mathbf{V}_\perp = \mathbf{I}_{N-r} - \mathbf{0} = \mathbf{I}_{N-r}$ .

( $\Leftarrow$ ) The matrix  $\bar{\mathbf{V}} = (\mathbf{V} \mid \mathbf{V}_\perp)$  is an element of  $\mathcal{O}(N)$ . We may therefore write

$$\mathbf{Q} = \bar{\mathbf{V}} \bar{\mathbf{V}}^T \mathbf{Q} \bar{\mathbf{V}} \bar{\mathbf{V}}^T = \bar{\mathbf{V}} \begin{pmatrix} \mathbf{V}^T \\ \mathbf{V}_\perp^T \end{pmatrix} \mathbf{Q} (\mathbf{V} \mid \mathbf{V}_\perp) \bar{\mathbf{V}}^T = \bar{\mathbf{V}} \begin{pmatrix} \mathbf{V}^T \mathbf{Q} \mathbf{V} & \mathbf{V}^T \mathbf{Q} \mathbf{V}_\perp \\ \mathbf{V}_\perp^T \mathbf{Q} \mathbf{V} & \mathbf{V}_\perp^T \mathbf{Q} \mathbf{V}_\perp \end{pmatrix} \bar{\mathbf{V}}^T \quad (34)$$

$$= \bar{\mathbf{V}} \begin{pmatrix} \mathbf{V}^T \mathbf{Q} \mathbf{V} & \mathbf{V}^T \mathbf{Q} \mathbf{V}_\perp \\ \mathbf{V}_\perp^T \mathbf{Q} \mathbf{V} & \mathbf{I} \end{pmatrix} \bar{\mathbf{V}}^T. \quad (35)$$

Whenever an orthogonal matrix contains an  $ij$ -th element of  $\pm 1$ , the remaining  $i$ -th row and  $j$ -th column elements are 0. With  $\bar{\mathbf{V}}^T \mathbf{Q} \bar{\mathbf{V}}$  orthogonal, the identity block in the bottom-right corner implies that  $\mathbf{V}^T \mathbf{Q} \mathbf{V}_\perp = \mathbf{0}$  and  $\mathbf{V}_\perp^T \mathbf{Q} \mathbf{V} = \mathbf{0}$ . The result is a block diagonal orthogonal matrix; the first block is  $\mathbf{V}^T \mathbf{Q} \mathbf{V}$  and the second is identity. It follows that  $\mathbf{G} = \mathbf{V}^T \mathbf{Q} \mathbf{V} \in \mathcal{O}(r)$ . We have

$$\mathbf{Q} = \bar{\mathbf{V}} \begin{pmatrix} \mathbf{V}^T \mathbf{Q} \mathbf{V} & \mathbf{0} \\ \mathbf{0} & \mathbf{I} \end{pmatrix} \bar{\mathbf{V}}^T = (\mathbf{V} \mid \mathbf{V}_\perp) \begin{pmatrix} \mathbf{V}^T \mathbf{Q} \mathbf{V} & \mathbf{0} \\ \mathbf{0} & \mathbf{I} \end{pmatrix} \begin{pmatrix} \mathbf{V}^T \\ \mathbf{V}_\perp^T \end{pmatrix} \quad (36)$$

$$= \mathbf{V}_\perp \mathbf{V}_\perp^T + \mathbf{V} \mathbf{V}^T \mathbf{Q} \mathbf{V} \mathbf{V}^T \quad (37)$$

$$= (\mathbf{V}_\perp \mathbf{V}_\perp^T + \mathbf{V} \mathbf{V}^T) - (\mathbf{V} \mathbf{V}^T + \mathbf{V} \mathbf{G} \mathbf{V}^T) \quad (38)$$

$$= \mathbf{I}_N - \mathbf{V}(\mathbf{I}_r - \mathbf{G})\mathbf{V}^T \quad (39)$$

The above simplification follows from  $\mathbf{I}_N = \bar{\mathbf{V}} \bar{\mathbf{V}}^T = \mathbf{V} \mathbf{V}^T + \mathbf{V}_\perp \mathbf{V}_\perp^T$ . □

**Corollary S.1.2.**  $\mathbf{I}_N$  is supported by  $\mathring{\mathcal{R}}(\mathbf{V})$ .

We can now proceed to the optimization problem. The objective of interest,  $f : \mathcal{O}(N)^m \rightarrow \mathbb{R}$ , is

$$f(\mathbf{Q}_1, \dots, \mathbf{Q}_m) = \sum_{i < j} \|\mathbf{Z}_i \mathbf{Q}_i - \mathbf{Z}_j \mathbf{Q}_j\|_F^2. \quad (40)$$

The next two lemmas are independent of  $f$ , but necessary for the final theorem.

**Lemma S.1.3.** *For  $\mathbf{Y}_{1:m}$ , we have  $\frac{1}{m} \sum_{i=1}^m \mathbf{Y}_i = \arg \min_{\mathbf{C}} \sum_{i=1}^m \|\mathbf{Y}_i - \mathbf{C}\|_F^2$ .*

*Proof.* Taking the derivative with respect to  $\mathbf{C}$  and setting equal to zero, we have:

$$\mathbf{0} = 2 \sum_{i=1}^m (\mathbf{C} - \mathbf{Y}_i) \quad \Rightarrow \quad \mathbf{C} = \frac{1}{m} \sum_{i=1}^m \mathbf{Y}_i \quad (41)$$

□

**Lemma S.1.4.** For  $\mathbf{C} = \frac{1}{m} \sum_{i=1}^m \mathbf{Y}_i$  we have  $\sum_{i < j} \|\mathbf{Y}_i - \mathbf{Y}_j\|_F^2 = \frac{1}{2} \sum_{i,j} \|\mathbf{Y}_i - \mathbf{Y}_j\|_F^2 = m \sum_{i=1}^m \|\mathbf{Y}_i - \mathbf{C}\|_F^2$ .

*Proof.* The first equality is due to

$$2 \sum_{i < j} \|\mathbf{Y}_i - \mathbf{Y}_j\|_F^2 = \sum_{i < j} \|\mathbf{Y}_i - \mathbf{Y}_j\|_F^2 + \sum_{i > j} \|\mathbf{Y}_i - \mathbf{Y}_j\|_F^2 + \sum_{i=1}^m \|\mathbf{Y}_i - \mathbf{Y}_i\|_F^2. \quad (42)$$

The second equality is due to

$$\sum_{i=1}^m \sum_{j=1}^m \|\mathbf{Y}_i - \mathbf{Y}_j\|_F^2 = \sum_{i=1}^m \left( \sum_{j=1}^m \text{tr}(\mathbf{Y}_i^T \mathbf{Y}_i) - 2 \text{tr}(\mathbf{Y}_i^T \mathbf{Y}_j) + \text{tr}(\mathbf{Y}_j^T \mathbf{Y}_j) \right) \quad (43)$$

$$= \sum_{i=1}^m \left( m \text{tr}(\mathbf{Y}_i^T \mathbf{Y}_i) - 2m \text{tr}(\mathbf{Y}_i^T \mathbf{C}) + \sum_{j=1}^m \text{tr}(\mathbf{Y}_j^T \mathbf{Y}_j) \right) \quad (44)$$

$$= \left( m \sum_{i=1}^m \text{tr}(\mathbf{Y}_i^T \mathbf{Y}_i) \right) - (2m^2 \text{tr}(\mathbf{C}^T \mathbf{C})) + \left( m \sum_{j=1}^m \text{tr}(\mathbf{Y}_j^T \mathbf{Y}_j) \right) \quad (45)$$

$$= \left( 2m \sum_{i=1}^m \text{tr}(\mathbf{Y}_i^T \mathbf{Y}_i) \right) - (2m^2 \text{tr}(\mathbf{C}^T \mathbf{C})) \quad (46)$$

and

$$m \sum_{i=1}^m \|\mathbf{Y}_i - \mathbf{C}\|_F^2 = m \sum_{i=1}^m \text{tr}(\mathbf{Y}_i^T \mathbf{Y}_i) - 2 \text{tr}(\mathbf{Y}_i^T \mathbf{C}) + \text{tr}(\mathbf{C}^T \mathbf{C}) \quad (47)$$

$$= \left( m \sum_{i=1}^m \text{tr}(\mathbf{Y}_i^T \mathbf{Y}_i) \right) - (2m^2 \text{tr}(\mathbf{C}^T \mathbf{C})) + (m^2 \text{tr}(\mathbf{C}^T \mathbf{C})) \quad (48)$$

$$= \left( m \sum_{i=1}^m \text{tr}(\mathbf{Y}_i^T \mathbf{Y}_i) \right) - (m^2 \text{tr}(\mathbf{C}^T \mathbf{C})) \quad (49)$$

□

**Lemma S.1.5.** Let  $\mathbf{R}_{1:m} \in \mathcal{O}(N)$  and let  $\mathcal{A} \subseteq \{1, 2, \dots, m\}$ . The following algorithm, which updates  $\mathbf{R}_i$  to  $\mathbf{R}'_i$ , results in  $f(\mathbf{R}_{1:m}) \geq f(\mathbf{R}'_{1:m})$ :

1.  $\mathbf{C} \leftarrow \frac{1}{m} \sum_{i=1}^m \mathbf{Z}_i \mathbf{R}_i$
2. for each  $j \in \{1, 2, \dots, m\} \setminus \mathcal{A}$ :  $\mathbf{R}'_j \leftarrow \mathbf{R}_j$
3. for each  $j \in \mathcal{A}$ :  $\mathbf{R}'_j \leftarrow \arg \min_{\mathbf{Q} \in \mathcal{O}(N)} \|\mathbf{Z}_j \mathbf{Q} - \mathbf{C}\|_F^2$

*Proof.* Let  $\mathbf{C}' = \frac{1}{m} \sum_{i=1}^m \mathbf{Z}_i \mathbf{R}'_i$ . We have

$$f(\mathbf{R}_{1:m}) = m \sum_{i=1}^m \|\mathbf{Z}_i \mathbf{R}_i - \mathbf{C}\|_F^2 \quad \text{from Lemma S.1.4} \quad (50)$$

$$\geq m \sum_{i=1}^m \|\mathbf{Z}_i \mathbf{R}'_i - \mathbf{C}\|_F^2 \quad \text{from the algorithm} \quad (51)$$

$$\geq m \sum_{i=1}^m \|\mathbf{Z}_i \mathbf{R}'_i - \mathbf{C}'\|_F^2 \quad \text{from Lemma S.1.3} \quad (52)$$

$$= f(\mathbf{R}'_{1:m}) \quad \text{from Lemma S.1.4} \quad (53)$$

□

**Lemma S.1.6.**  $f$  is bounded by below.

*Proof.*  $f$  is the sum of nonnegative entries, so it is lower bounded by 0. □

**Lemma S.1.7.** For  $\mathbf{R} \in \mathcal{O}(N)$ ,  $f(\mathbf{Q}_1, \mathbf{Q}_2, \dots, \mathbf{Q}_m) = f(\mathbf{Q}_1 \mathbf{R}, \mathbf{Q}_2 \mathbf{R}, \dots, \mathbf{Q}_m \mathbf{R})$ .

*Proof.* The Frobenius norm is unitarily invariant:  $\|\mathbf{Z}_i \mathbf{Q}_i \mathbf{R} - \mathbf{Z}_j \mathbf{Q}_j \mathbf{R}\|_F^2 = \|\mathbf{Z}_i \mathbf{Q}_i - \mathbf{Z}_j \mathbf{Q}_j\|_F^2$ . □

In what follows, we use  $f(\mathbf{Q}_{1:m}) = \frac{1}{2} \sum_{i,j} \|\mathbf{Z}_i \mathbf{Q}_i - \mathbf{Z}_j \mathbf{Q}_j\|_F^2$  (Lemma S.1.4). With respect to  $\mathbf{Q}_k$ , the unconstrained derivative is

$$\frac{\partial f}{\partial \mathbf{Q}_k} = -\mathbf{Z}_k^T \sum_{i=1}^m \mathbf{Z}_i \mathbf{Q}_i \quad (54)$$

Thus, a critical point  $(\mathbf{S}_1, \dots, \mathbf{S}_m)$  must satisfy [5]:

$$\mathbf{S}_k^T \mathbf{Z}_k^T \sum_{i=1}^m \mathbf{Z}_i \mathbf{S}_i \in \mathbb{S}^N \quad (55)$$

for each  $k$ , where  $\mathbb{S}^N$  denotes the set of  $N \times N$  symmetric matrices.

**Lemma S.1.8.** For  $\mathbf{R} \in \mathcal{O}(N)$ , if  $(\mathbf{S}_1, \dots, \mathbf{S}_m)$  is a critical point of  $f$ , then so is  $(\mathbf{S}_1 \mathbf{R}, \dots, \mathbf{S}_m \mathbf{R})$ .

*Proof.* For each  $k$  we have  $\mathbf{F}_k = \mathbf{S}_k^T \mathbf{Z}_k^T \sum_{i=1}^m \mathbf{Z}_i \mathbf{S}_i$  symmetric. If  $\mathbf{F}_k$  is symmetric then so is  $\mathbf{R}^T \mathbf{F}_k \mathbf{R} = (\mathbf{S}_k \mathbf{R})^T \mathbf{Z}_k^T \sum_{i=1}^m \mathbf{Z}_i (\mathbf{S}_i \mathbf{R})$ . □

Let  $r = mt$  and let  $\mathbf{W} = [\mathbf{Z}_1^T \ \mathbf{Z}_2^T \ \dots \ \mathbf{Z}_m^T]^T \in \mathbb{R}^{r \times N}$  have SVD  $\mathbf{U} \Sigma \mathbf{V}^T$ , where  $\mathbf{U} \in \mathcal{O}(r)$  and  $\mathbf{V} \in \text{St}(N, r)$ . In the notation of kernel hyperalignment, we have  $\mathbf{Z}_i = \Phi_i \mathbf{A}_i^{-\frac{1}{2}}$  and  $\Phi_0 = [\Phi_1^T \ \Phi_2^T \ \dots \ \Phi_m^T]^T$ .

**Lemma S.1.9.**  $\mathbf{Z}_i = \mathbf{Z}_i \mathbf{V} \mathbf{V}^T$ .

*Proof.* Let  $\mathbf{E}_i = [\underbrace{\mathbf{0}_{t \times t} \ \dots \ \mathbf{0}_{t \times t}}_{i-1} \ \mathbf{I}_t \ \underbrace{\mathbf{0}_{t \times t} \ \dots \ \mathbf{0}_{t \times t}}_{m-i}]^T$ . We have  $\mathbf{Z}_i = \mathbf{E}_i^T \mathbf{W} = \mathbf{E}_i^T \mathbf{U} \Sigma \mathbf{V}^T$  and

$$\mathbf{Z}_i \mathbf{V} \mathbf{V}^T = (\mathbf{E}_i^T \mathbf{W}) \mathbf{V} \mathbf{V}^T = \mathbf{E}_i^T \mathbf{U} \Sigma \mathbf{V}^T \mathbf{V} \mathbf{V}^T = \mathbf{E}_i^T \mathbf{U} \Sigma \mathbf{V}^T. \quad \square$$

**Theorem S.1.10.** Any global minimizer of  $f$  can be mapped to another global minimizer whose entries are supported by  $\mathring{\mathcal{R}}(\mathbf{V})$ .

*Proof.* Let  $(\tilde{\mathbf{S}}_1, \dots, \tilde{\mathbf{S}}_m)$  be a global minimizer of  $f$ . Because  $f$  is differentiable and bounded by below,  $(\tilde{\mathbf{S}}_1, \dots, \tilde{\mathbf{S}}_m)$  is a critical point. We form  $\mathbf{S}_i = \tilde{\mathbf{S}}_i \mathbf{S}_1^T$ . From Lemmas S.1.7 and S.1.8  $\mathbf{S}_{1:m}$  is also a global minimizer and a critical point. With  $(\mathbf{S}_1, \mathbf{S}_2, \dots, \mathbf{S}_m) = (\mathbf{I}, \mathbf{S}_2, \dots, \mathbf{S}_m)$ , we have

$$\mathbf{S}_k^T \mathbf{Z}_k^T \sum_{i=1}^m \mathbf{Z}_i \mathbf{S}_i = \mathbf{S}_k^T \mathbf{Z}_k^T \mathbf{M} \in \mathbb{S}^N, \quad (56)$$

where  $\mathbf{M} = \sum_{i=1}^m \mathbf{Z}_i \mathbf{S}_i$ . Every symmetric matrix is diagonalizable [11] so there exists unitary  $\mathbf{P}_k$  and diagonal  $\mathbf{D}_k$  such that

$$\mathbf{S}_k^T \mathbf{Z}_k^T \mathbf{M} = \mathbf{M}^T \mathbf{Z}_k \mathbf{S}_k = \mathbf{P}_k \mathbf{D}_k \mathbf{P}_k^T. \quad (57)$$

Using Lemma S.1.9 we obtain

$$\mathbf{M}^T \mathbf{Z}_k \mathbf{V} \mathbf{V}^T \mathbf{S}_k = \mathbf{P}_k \mathbf{D}_k \mathbf{P}_k^T \quad (58)$$

$$\mathbf{M}^T \mathbf{Z}_k \mathbf{V} \mathbf{V}^T = \mathbf{P}_k \mathbf{D}_k \mathbf{P}_k^T \mathbf{S}_k^T \quad (59)$$

$$\mathbf{S}_k \mathbf{M}^T \mathbf{Z}_k \mathbf{V} \mathbf{V}^T = \mathbf{S}_k \mathbf{P}_k \mathbf{D}_k \mathbf{P}_k^T \mathbf{S}_k^T \quad (60)$$

$$\mathbf{S}_k \mathbf{M}^T \mathbf{Z}_k \mathbf{V} \mathbf{V}^T = (\mathbf{S}_k \mathbf{P}_k) \mathbf{D}_k (\mathbf{S}_k \mathbf{P}_k)^T. \quad (61)$$

Let  $\mathbf{V}_\perp \in \mathcal{N}(\mathbf{V})$ . With  $\mathbf{S}_k \mathbf{M}^T \mathbf{Z}_k \mathbf{V} \mathbf{V}^T$  symmetric and  $(\mathbf{S}_k \mathbf{M}^T \mathbf{Z}_k \mathbf{V} \mathbf{V}^T) \mathbf{V}_\perp = \mathbf{0}$ , it follows that  $\mathbf{S}_k \mathbf{P}_k = [\mathbf{V} \mathbf{A}_k \mid \mathbf{V}_\perp]$  for some  $\mathbf{A}_k \in \mathcal{O}(r)$  and  $(N - r)$  of the eigenvalues are zero. We may therefore use

$$\mathbf{S}_k = [\mathbf{V} \mathbf{A}_k \mid \mathbf{V}_\perp] \mathbf{P}_k^T, \quad \mathbf{P}_k = [\mathbf{S}_k^T \mathbf{V} \mathbf{A}_k \mid \mathbf{S}_k^T \mathbf{V}_\perp] \quad \text{and} \quad \mathbf{D}_k = \begin{pmatrix} \bar{\mathbf{D}}_k & \mathbf{0} \\ \mathbf{0} & \mathbf{0} \end{pmatrix}, \quad (62)$$

where  $\bar{\mathbf{D}}_k$  is  $r \times r$  diagonal.

We now wish to show that  $\mathbf{M} \mathbf{S}_k^T \mathbf{V}_\perp = \mathbf{0}$  for each  $k$ . We first note that

$$\sum_{j=1}^m \mathbf{M}^T \mathbf{Z}_j \mathbf{S}_j = \sum_{j=1}^m \mathbf{M}^T \mathbf{Z}_j \mathbf{V} \mathbf{V}^T \mathbf{S}_j = \sum_{j=1}^m \mathbf{P}_j \mathbf{D}_j \mathbf{P}_j^T \quad (63)$$

$$= \mathbf{M}^T \sum_{j=1}^m \mathbf{Z}_j \mathbf{S}_j = \mathbf{M}^T \mathbf{M} = \sum_{i,j} \mathbf{S}_i^T \mathbf{Z}_i^T \mathbf{Z}_j \mathbf{S}_j. \quad (64)$$

We have

$$\mathbf{V}_\perp^T \mathbf{S}_k \mathbf{M}^T \mathbf{M} \mathbf{S}_k^T \mathbf{V}_\perp = \mathbf{V}_\perp^T \mathbf{S}_k \left( \sum_{j=1}^m \mathbf{P}_j \mathbf{D}_j \mathbf{P}_j^T \right) \mathbf{S}_k^T \mathbf{V}_\perp \quad (65)$$

$$= \mathbf{V}_\perp^T (\mathbf{V} \mathbf{A}_k \mid \mathbf{V}_\perp) \mathbf{P}_k^T \left( \sum_{j=1}^m \mathbf{P}_j \mathbf{D}_j \mathbf{P}_j^T \right) \mathbf{P}_k \begin{pmatrix} \mathbf{A}_k^T \mathbf{V}^T \\ \mathbf{V}_\perp^T \end{pmatrix} \mathbf{V}_\perp \quad (66)$$

$$= (\mathbf{0} \mid \mathbf{I}) \left( \sum_{j=1}^m (\mathbf{P}_k^T \mathbf{P}_j) \begin{pmatrix} \bar{\mathbf{D}}_j & \mathbf{0} \\ \mathbf{0} & \mathbf{0} \end{pmatrix} (\mathbf{P}_j^T \mathbf{P}_k) \right) \begin{pmatrix} \mathbf{0} \\ \mathbf{I} \end{pmatrix} \quad (67)$$

$$= (\mathbf{0} \mid \mathbf{I}) \left( \sum_{j=1}^m \begin{pmatrix} * & \mathbf{0} \\ \mathbf{0} & \mathbf{0} \end{pmatrix} \right) \begin{pmatrix} \mathbf{0} \\ \mathbf{I} \end{pmatrix} \quad (68)$$

$$= (\mathbf{0} \mid \mathbf{I}) \begin{pmatrix} * & \mathbf{0} \\ \mathbf{0} & \mathbf{0} \end{pmatrix} \begin{pmatrix} \mathbf{0} \\ \mathbf{I} \end{pmatrix} \quad (69)$$

$$= \mathbf{0}. \quad (70)$$

It follows that

$$\|\mathbf{M} \mathbf{S}_k^T \mathbf{V}_\perp\|_F^2 = \text{tr}(\mathbf{V}_\perp^T \mathbf{S}_k \mathbf{M}^T \mathbf{M} \mathbf{S}_k^T \mathbf{V}_\perp) = \text{tr}(\mathbf{0}) = 0 \quad (71)$$

and so necessarily we have  $\mathbf{M} \mathbf{S}_k^T \mathbf{V}_\perp = \mathbf{0}$  (a norm separates points). With  $\mathbf{S}_1 = \mathbf{I}$  we also have  $\mathbf{M} \mathbf{V}_\perp = \mathbf{0}$ .

The minimizer  $\mathbf{S}_{1:m}$  is fixed and consequently so is  $\mathbf{M}$ . Let  $\mathbf{C} = \frac{1}{m} \mathbf{M}$  be the centroid of the mappings. Corollary S.1.2 tells us that  $\mathbf{S}_1 = \mathbf{I}$  is supported by  $\mathring{\mathcal{R}}(\mathbf{V})$  so we consider  $\mathbf{S}_{2:m}$ . For each  $k = 2, 3, \dots, m$  we generate a new  $\mathbf{S}_k$  by solving  $\arg \min_{\mathbf{Q} \in \mathcal{O}(N)} \|\mathbf{Z}_k \mathbf{Q} - \mathbf{C}\|_F^2$ . Lemma S.1.5 guarantees that this new point will not increase the objective and so it will also be a global minimizer.

Starting with  $k = 2$  we seek an orthogonal  $\mathbf{Q}$  to minimize  $\|\mathbf{Z}_2\mathbf{Q} - \mathbf{C}\|_F^2 = \text{CONST} - 2\text{tr}(\mathbf{Q}^T\mathbf{Z}_2^T\mathbf{C})$  or maximize  $\text{tr}(\mathbf{Q}^T\mathbf{Z}_2^T\mathbf{M})$ . The problem at hand is the classical orthogonal Procrustes problem. A solution is found with full left and right singular matrices of  $\mathbf{Y} = \mathbf{Z}_2^T\mathbf{M}$ . Now,  $\mathbf{V}_\perp^T\mathbf{Y} = \mathbf{0}$  because  $\mathbf{Z}_2^T = \mathbf{V}\mathbf{V}^T\mathbf{Z}_2^T$  from Lemma S.1.9. Furthermore,  $\mathbf{Y}\mathbf{V}_\perp = \mathbf{0}$  because  $\mathbf{M}\mathbf{V}_\perp = \mathbf{0}$ . Thus, the SVD of  $\mathbf{Y}$  admits respective left and right singular matrices  $[\mathbf{V}\mathbf{B} \mid \mathbf{V}_\perp]$  and  $[\mathbf{V}\mathbf{B}' \mid \mathbf{V}_\perp]$  for some orthogonal  $\mathbf{B}$  and  $\mathbf{B}'$ . It follows that  $\mathbf{Q}_* = [\mathbf{V}\mathbf{B} \mid \mathbf{V}_\perp][\mathbf{V}\mathbf{B}' \mid \mathbf{V}_\perp]^T$  is a valid minimizer with which we update  $\mathbf{S}_2$ . This process is then repeated for  $k = 3, \dots, m$ . Finally, we note that

$$\mathbf{V}_\perp^T[\mathbf{V}\mathbf{B} \mid \mathbf{V}_\perp][\mathbf{V}\mathbf{B}' \mid \mathbf{V}_\perp]^T\mathbf{V}_\perp = [\mathbf{0} \mid \mathbf{I}][\mathbf{0} \mid \mathbf{I}]^T = \mathbf{I}, \quad (72)$$

so from Lemma S.1.1, the updates produce a global minimizer supported by  $\hat{\mathcal{R}}(\mathbf{V})$ .  $\square$

## S.2 Derivation of (11)

$$\begin{aligned} \mathbf{R}_i^T\Phi_i^T\Psi &= \frac{1}{|\mathcal{A}|} \sum_{j \in \mathcal{A}} \left( [\mathbf{I} - \Phi_0^T\mathbf{K}_0^{-1}\Phi_0 + \Phi_0^T\mathbf{K}_0^{-\frac{1}{2}}\mathbf{G}_i^T\mathbf{K}_0^{-\frac{1}{2}}\Phi_0] \Phi_i^T\mathbf{B}_i \right. \\ &\quad \left. \mathbf{B}_j\Phi_j [\mathbf{I} - \Phi_0^T\mathbf{K}_0^{-1}\Phi_0 + \Phi_0^T\mathbf{K}_0^{-\frac{1}{2}}\hat{\mathbf{G}}_j\mathbf{K}_0^{-\frac{1}{2}}\Phi_0] \right) \end{aligned} \quad (73)$$

$$\begin{aligned} &= \text{CONST} + \frac{1}{|\mathcal{A}|} \sum_{j \in \mathcal{A}} \left( \Phi_0^T\mathbf{K}_0^{-\frac{1}{2}}\mathbf{G}_i^T\mathbf{K}_0^{-\frac{1}{2}}\Phi_0\Phi_i^T\mathbf{B}_i\mathbf{B}_j\Phi_j \right. \\ &\quad \left. [\mathbf{I} - \Phi_0^T\mathbf{K}_0^{-1}\Phi_0 + \Phi_0^T\mathbf{K}_0^{-\frac{1}{2}}\hat{\mathbf{G}}_j\mathbf{K}_0^{-\frac{1}{2}}\Phi_0] \right), \end{aligned} \quad (74)$$

and so

$$\begin{aligned} &\text{tr}(\mathbf{R}_i^T\Phi_i^T\Phi_0) + \text{CONST} \\ &= \text{tr} \left( \frac{1}{|\mathcal{A}|} \sum_{j \in \mathcal{A}} \mathbf{G}_i^T\mathbf{K}_0^{-\frac{1}{2}}\mathbf{K}_{0i}\mathbf{B}_i\mathbf{B}_j\Phi_j \left( \mathbf{I} - \Phi_0^T\mathbf{K}_0^{-1}\Phi_0 + \Phi_0^T\mathbf{K}_0^{-\frac{1}{2}}\hat{\mathbf{G}}_j\mathbf{K}_0^{-\frac{1}{2}}\Phi_0 \right) \Phi_0^T\mathbf{K}_0^{-\frac{1}{2}} \right) \\ &= \text{tr} \left( \mathbf{G}_i^T\mathbf{K}_0^{-\frac{1}{2}}\mathbf{K}_{0i}\mathbf{B}_i \left[ \frac{1}{|\mathcal{A}|} \sum_{j \in \mathcal{A}} \mathbf{B}_j(\Phi_j\Phi_0^T - \Phi_j\Phi_0^T\mathbf{K}_0^{-1}\Phi_0\Phi_0^T \right. \right. \\ &\quad \left. \left. + \Phi_j\Phi_0^T\mathbf{K}_0^{-\frac{1}{2}}\hat{\mathbf{G}}_j\mathbf{K}_0^{-\frac{1}{2}}\Phi_0\Phi_0^T) \right] \mathbf{K}_0^{-\frac{1}{2}} \right) \\ &= \text{tr} \left( \mathbf{G}_i^T\mathbf{K}_0^{-\frac{1}{2}}\mathbf{K}_{0i}\mathbf{B}_i \left[ \frac{1}{|\mathcal{A}|} \sum_{j \in \mathcal{A}} \mathbf{B}_j(\mathbf{K}_{j0} - \mathbf{K}_{j0}\mathbf{K}_0^{-1}\mathbf{K}_0 + \mathbf{K}_{j0}\mathbf{K}_0^{-\frac{1}{2}}\hat{\mathbf{G}}_j\mathbf{K}_0^{-\frac{1}{2}}\mathbf{K}_0) \right] \mathbf{K}_0^{-\frac{1}{2}} \right) \\ &= \text{tr} \left( \mathbf{G}_i^T\mathbf{K}_0^{-\frac{1}{2}}\mathbf{K}_{0i}\mathbf{B}_i \left[ \frac{1}{|\mathcal{A}|} \sum_{j \in \mathcal{A}} \mathbf{B}_j\mathbf{K}_{j0}\mathbf{K}_0^{-\frac{1}{2}}\hat{\mathbf{G}}_j \right] \right) \end{aligned} \quad (75)$$

$$= \text{tr} \left( \mathbf{G}_i^T\tilde{\mathbf{B}}_i^T \left[ \frac{1}{|\mathcal{A}|} \sum_{j \in \mathcal{A}} \tilde{\mathbf{B}}_j\hat{\mathbf{G}}_j \right] \right) \quad (76)$$

### S.3 The Orthogonal Procrustes Problem for $n \geq 2t$

We can use the approach taken in formulating the kernel hyperalignment algorithm for solving  $\arg \min_{\mathbf{R} \in \mathcal{O}(n)} \|\mathbf{X}\mathbf{R} - \mathbf{Y}\|_{\mathbb{F}}^2$ . Here,  $\mathbf{X}, \mathbf{Y} \in \mathbb{R}^{t \times n}$  and  $n \geq 2t$ . We form plane support via  $[\mathbf{X}^T \mid \mathbf{Y}^T]^T \in \mathbb{R}^{2t \times n}$ .

Let  $[\mathbf{X}^T \mid \mathbf{Y}^T]^T$  have SVD  $\tilde{\mathbf{U}}\tilde{\Sigma}\tilde{\mathbf{V}}^T$  with  $\tilde{\Sigma}$   $r \times r$  diagonal, where  $r$  is the rank of the matrix. Impose  $\mathbf{R} = \mathbf{I}_n - \tilde{\mathbf{V}}(\mathbf{I}_r - \mathbf{G})\tilde{\mathbf{V}}^T$  for some  $\mathbf{G} \in \mathcal{O}(n)$ . It follows that we wish to maximize  $\text{tr}(\tilde{\mathbf{V}}^T \mathbf{G}^T \tilde{\mathbf{V}} \mathbf{X}^T \mathbf{Y}) = \text{tr}(\mathbf{G}^T \tilde{\mathbf{V}}^T \mathbf{X}^T \mathbf{Y} \tilde{\mathbf{V}})$ . Thus, we take the full SVD of  $\tilde{\mathbf{V}}^T \mathbf{X}^T \mathbf{Y} \tilde{\mathbf{V}} = \tilde{\mathbf{U}}\tilde{\Sigma}\tilde{\mathbf{V}}^T$  and set  $\mathbf{G}_\star = \tilde{\mathbf{U}}\tilde{\mathbf{V}}^T$ .

In total, this solution requires 2 SVDs: one of a  $2t \times n$  matrix and one of an  $r \times r$  matrix. Respectively, these SVDs cost  $O(4t^2n)$  and  $O(r^3)$  operations. By construction  $r \leq 2t$ , so the total SVD cost in the worst case is  $O(4t^2n + 8t^3)$ , which is linear in  $n$ .

As a final note, the storage requirement for the dense  $\mathbf{R}$  is  $n^2$  entries. However, given the imposed decomposition, the storage reduces to  $nr$  for  $\tilde{\mathbf{V}}$  and  $r^2$  for  $\mathbf{G}$ , yielding a total of  $nr + r^2$ . Necessarily, there is always a storage benefit because  $nr + r^2 \geq n^2 \Rightarrow n/r \leq (1 + \sqrt{5})/2 \approx 1.618$  (Golden Ratio). With  $r \leq 2t \leq n$ , we have  $n/r \geq 2 > (1 + \sqrt{5})/2$ .

### S.4 Kernels used for experiments

Recall that  $n$  is the number of voxels.

- Linear

$$\langle \mathbf{x}_1, \mathbf{x}_2 \rangle \quad (77)$$

- Quadratic

$$\left( \frac{n}{22.5} + \langle \mathbf{x}_1, \mathbf{x}_2 \rangle \right)^2 \quad (78)$$

- Gaussian

$$\exp \left\{ \frac{\|\mathbf{x}_1 - \mathbf{x}_2\|_2^2}{22455} \right\} \quad (79)$$

- Sigmoid

$$\tanh \left( \frac{7}{n} \langle \mathbf{x}_1, \mathbf{x}_2 \rangle \right) \quad (80)$$
